# Supplementary material for: Cu and As(V) Adsorption and Desorption on/from Different Soils and Bio-Adsorbents
Source: MDPI journal article supplement (doi:10.3390/ma15145023), 2022-07-19
Supplement: s1 [file s1]

## **Supplementary Material**

### **Cu and As(V) adsorption and desorption on/from different soils and bio-adsorbents**

**Raquel Cela-Dablanca<sup>1\*</sup>, Ana Barreiro<sup>1</sup>, Gustavo Ferreira-Coelho<sup>1</sup>, Claudia Campillo-Cora<sup>2</sup>, Paula Pérez-Rodríguez<sup>2</sup>, Manuel Arias-Estévez<sup>2</sup>, Avelino Núñez-Delgado<sup>1</sup>, Esperanza Álvarez-Rodríguez<sup>1</sup>, María J. Fernández-Sanjurjo<sup>1</sup>**

<sup>1</sup> Department of Soil Science and Agricultural Chemistry, Engineering Polytechnic School, Univ. Santiago de Compostela, 27002 Lugo, Spain

<sup>2</sup> Soil Science and Agricultural Chemistry, Fac. Sciences, Univ. Vigo, 32004 Ourense, Spain

\* Corresponding author

### Determination of BET surface area of the bio-adsorbents

To carry out the determination, ASAP 2020 equipment (MICROMERITICS) was used, providing nitrogen adsorption-desorption isotherms. Replicate quantifications were performed (n=3), with coefficients of variation always lower than 5%.

In order to assure the quality/assurance of the results, standard calibration and measurement conditions were used.

**Table S1.** Data corresponding to the BET surface area results for the six soils studied. Mean values (n=3) with coefficients of variation always <5%.

|                                       | Soil    |         |         |         |         |         |
|---------------------------------------|---------|---------|---------|---------|---------|---------|
|                                       | 3AL     | 19AL    | 50AL    | 6S      | 51S     | 71S     |
| Amount of sample (g)                  | 2.3359  | 2.3638  | 2.5429  | 2.1257  | 2.1137  | 2.2888  |
| COLD (cm <sup>3</sup> )               | 50.3433 | 46.9199 | 46.2303 | 48.2006 | 61.9809 | 44.7715 |
| WARM (cm <sup>3</sup> )               | 15.3617 | 15.8015 | 15.5919 | 16.1646 | 20.2309 | 15.3185 |
| BET (m <sup>2</sup> g <sup>-1</sup> ) | 1.647   | 1.7161  | 2.0807  | 5.1653  | 5.4753  | 6.0713  |

**Table S2.** Data corresponding to the BET surface area results for the three bio-adsorbent materials studied. Mean values (n=3) with coefficients of variation always <5%.

|                                       | Oak ash | Pine bark | Mussel shell |
|---------------------------------------|---------|-----------|--------------|
| Amount of sample (g)                  | 1.9959  | 1.7630    | 2.9101       |
| COLD (cm <sup>3</sup> )               | 49.3853 | 45.6137   | 45.6374      |
| WARM (cm <sup>3</sup> )               | 15.6920 | 15.3332   | 15.3671      |
| BET (m <sup>2</sup> g <sup>-1</sup> ) | 1.3336  | 0.3320    | 1.1318       |
